# Supplementary material for: Cleavage of a C–C σ bond between two phenyl groups under mild conditions during the construction of Zn(ii) organic frameworks
Source: Royal Society of Chemistry journal article supplement (doi:10.1039/c6gc01686c), 2016-01-01
Supplement: c6gc01686c1.pdf [file c6gc01686c1.pdf]

Supporting Information For

**Cleavage of C–C  $\sigma$  bond between two phenyl groups under mild conditions  
during the construction of Zn(II) organic frameworks**

Bo Liu,<sup>a,b</sup> Hui-Fang Zhou,<sup>a</sup> Zheng-Hui Guan,<sup>a</sup> Lei Hou,<sup>a</sup> Bin Cui,<sup>a</sup> Yao-Yu Wang<sup>\*a</sup>

<sup>a</sup>Key Laboratory of Synthetic and Natural Functional Molecule Chemistry of the Ministry of Education, Shaanxi Key Laboratory of Physico-Inorganic Chemistry, College of Chemistry & Materials Science, Northwest University, Xi'an 710069, P. R. China

<sup>b</sup>College of Science, Northwest A&F University, Yangling, 712100, P. R. China

**EXPERIMENTAL SECTION**

**Materials and Measurements.** All reagents and solvents were commercially available and were used without further purification. Infrared spectra were obtained in KBr discs on a Nicolet Avatar 360 FTIR spectrometer in the 400-4000 cm<sup>-1</sup> region. Elemental analyses (C, H and N) were performed with a PerkinElmer 2400C Elemental Analyzer. <sup>1</sup>H NMR spectra were recorded on Varian instrument (400 MHz) and (100 MHz). Thermal gravimetric analyses (TGA) were carried out in nitrogen stream using a Netzsch TG209F3 equipment at a heating rate of 5 °C/min. Powder X-ray diffraction (PXRD) data were recorded on a Bruker D8 ADVANCE X-ray powder diffractometer (Cu K $\alpha$ , 1.5418 Å). All the gas sorption isotherms were measured by using a ASAP 2020M adsorption equipment.

**Synthesis of [Zn(dbba)(Hbpe)]·H<sub>2</sub>O (1).** A mixture of Zn(NO<sub>3</sub>)<sub>2</sub>·6H<sub>2</sub>O (59.5 mg, 0.2 mmol), H<sub>3</sub>dbba (26.2 mg, 0.1 mmol), and bpe (18.2 mg, 0.1 mmol) in H<sub>2</sub>O/DMF (4/1, v/v 5 mL) was placed in a screw-capped vial in an oven at 105 °C for 72 h, and then cooled to room temperature at a rate of 0.5 °C min<sup>-1</sup>. The resulting colorless block crystals of **1** were isolated by washing with H<sub>2</sub>O/DMF, and dried in air. The yield was *ca.* 20.2 mg (67.6%). Anal. Calcd for C<sub>27</sub>H<sub>20</sub>ZnN<sub>2</sub>O<sub>7</sub>: C, 58.98; H, 3.67; N, 5.10%. Found: C, 59.06; H, 3.55; N, 5.02%.

**Synthesis of [Zn(bdc)(bpe)<sub>0.5</sub>]·H<sub>2</sub>O·DMF (2).** A mixture of Zn(NO<sub>3</sub>)<sub>2</sub>·6H<sub>2</sub>O (59.5 mg, 0.2 mmol), H<sub>3</sub>dbba (26.2 mg, 0.1 mmol), and bpe (18.2 mg, 0.1 mmol) in DMF (5 mL) was placed in a screw-capped vial in an oven at 105 °C for 48 h, and then cooled to room temperature at a rate of 0.5 °C min<sup>-1</sup>. The resulting colorless block crystals of **2** were isolated by washing with DMF, and dried in air. The yield was *ca.* 28.5 mg (86.4%). Anal. Calcd for C<sub>17</sub>H<sub>18</sub>ZnN<sub>2</sub>O<sub>6</sub>: C, 49.59; H, 4.41; N, 6.80%. Found: C, 49.68; H, 4.30; N, 6.69%.

**Crystallography**

Diffraction data were collected at 296(2) K with a Mo K $\alpha$  radiation ( $\lambda$  = 0.71073 Å) on a Bruker-AXS SMART CCD area detector diffractometer. Absorption corrections were carried out utilizing SADABS routine.<sup>1</sup> The structures were solved by the direct methods and refined using the SHELXTL program package.<sup>2</sup> All non-hydrogen atoms were refined anisotropically with the hydrogen atoms added to their geometrically ideal positions and refined isotropically. The contribution of the disordered solvent molecules in **2** was subtracted from the reflection data by the SQUEEZE method as implemented in PLATON program.<sup>3</sup> The final formulas of **1** and **2** were

determined by combining the single-crystal structures, elemental microanalyses and TGA data. Selected crystallographic data and structure refinement results are listed in Table S5.

1 Bruker. *SADABS*, *SMART* and *SAINT*. Bruker AXS Inc., Madison, Wisconsin, USA, 2002.

2 Sheldrick, G. M. *SHELXL-97, program for the refinement of the crystal structures*. University of Göttingen, Germany, 1997.

3 Spek, A. L. *J. Appl. Crystallogr.* **2003**, *36*, 7–13.

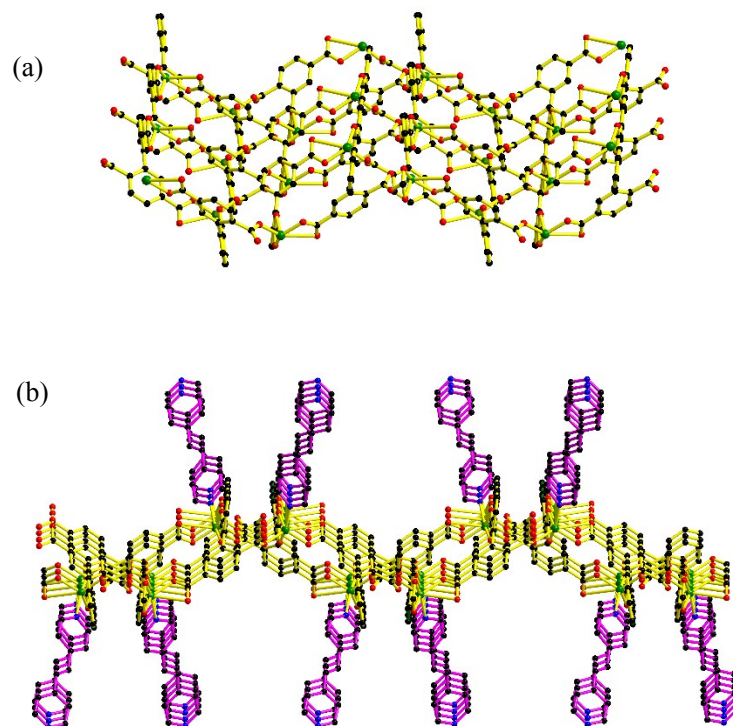

**Figure S1.** (a) The 2D layer formed by dbba<sup>3-</sup> and Zn(II) atoms, and (b) the 2D structure of **1** with the Hbpe<sup>+</sup> ligands are lined in both sides of the layer.

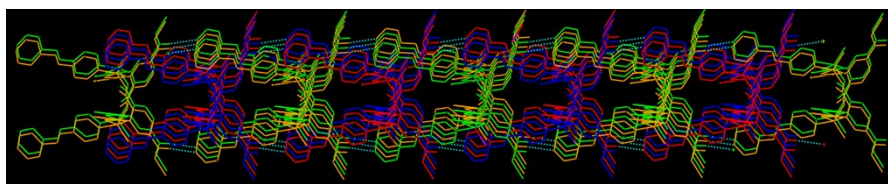

(a)

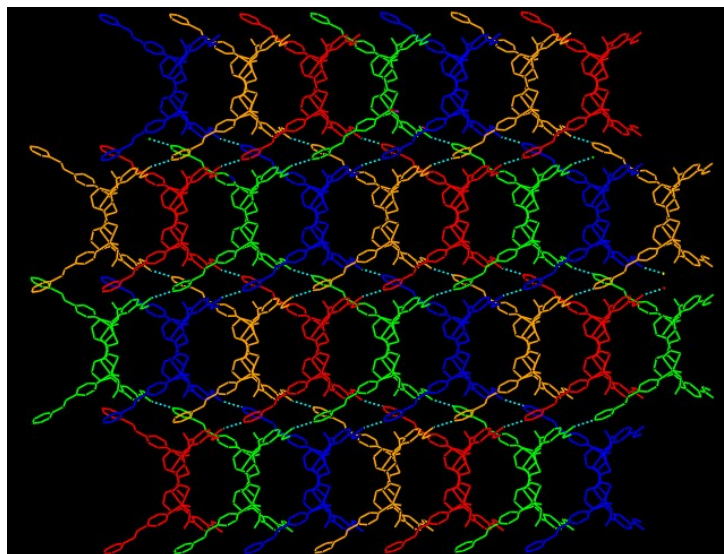

(b)

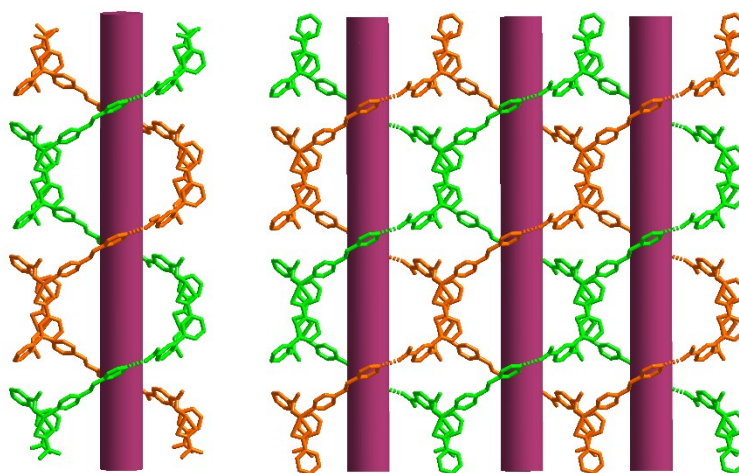

(c)

**Figure S2.** (a, b) View of the four-fold interpenetrated structure along a-axis b-axis, and (c) the 2-fold right-handed  $2_1$  helical chains and its expand layer are formed by interlayer hydrogen bonds along a-axis. The dotted lines represent the hydrogen bonds.

**Table S1.** The results of some solvents used in the reaction system

| Solvent          | Result/Complex | Solvent | Result   |
|------------------|----------------|---------|----------|
| H <sub>2</sub> O | <b>1</b>       | DMA     | <b>2</b> |
| DMF              | <b>2</b>       | DEF     | <b>2</b> |

**Table S2.** Using different zinc salts for preparing complex **2**.

| Zinc salt                                             | Result                                            | Notes                                                                                                                    |
|-------------------------------------------------------|---------------------------------------------------|--------------------------------------------------------------------------------------------------------------------------|
| Zn(NO <sub>3</sub> ) <sub>2</sub> ·6H <sub>2</sub> O  | Pure and good quality, complex <b>2</b>           | H <sub>3</sub> dbba (0.1 mmol)<br>bpe (0.1 mmol)<br>Zinc salt (0.2 mmol)<br>in DMF<br>T = 105 °C<br>reaction time = 72 h |
| Zn(ClO <sub>4</sub> ) <sub>2</sub> ·6H <sub>2</sub> O | Pure and good quality, complex <b>2</b>           |                                                                                                                          |
| Zn(Ac) <sub>2</sub> ·2H <sub>2</sub> O                | Pure and good quality, complex <b>2</b>           |                                                                                                                          |
| ZnCl <sub>2</sub>                                     | Large number of small crystal                     |                                                                                                                          |
| ZnSO <sub>4</sub> ·7H <sub>2</sub> O                  | Large number of small crystal with small impurity |                                                                                                                          |
| 5ZnO·2CO <sub>2</sub> ·4H <sub>2</sub> O              | Large number of small crystal                     |                                                                                                                          |

**Table S3.** The effect of reaction temperatures for preparing complex **2**.

| Temperature/°C | Reaction time/h | Result                                 |
|----------------|-----------------|----------------------------------------|
| 50             | 72              | Light yellow solution                  |
| 70             | 72              | Orange yellow solution, small crystals |
| 90             | 72              | Yellow solution, large crystals        |
| 105            | 72              | Yellow solution, very large crystals   |

**Table S4.** The effect of reaction times for preparing complex **2**.

| Temperature/°C | Reaction time/h | Result                              |
|----------------|-----------------|-------------------------------------|
| 105            | 0               | Colorless transparent liquid        |
| 105            | 2               | Light yellow transparent liquid     |
| 105            | 6               | Deep yellow transparent liquid      |
| 105            | 8               | Yellow turbid liquid                |
| 105            | 10              | Yellow transparent liquid           |
| 105            | 12              | Yellow transparent liquid, crystals |

**Figure S3.** Copies of  $^1\text{H}$  spectra:

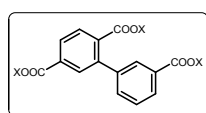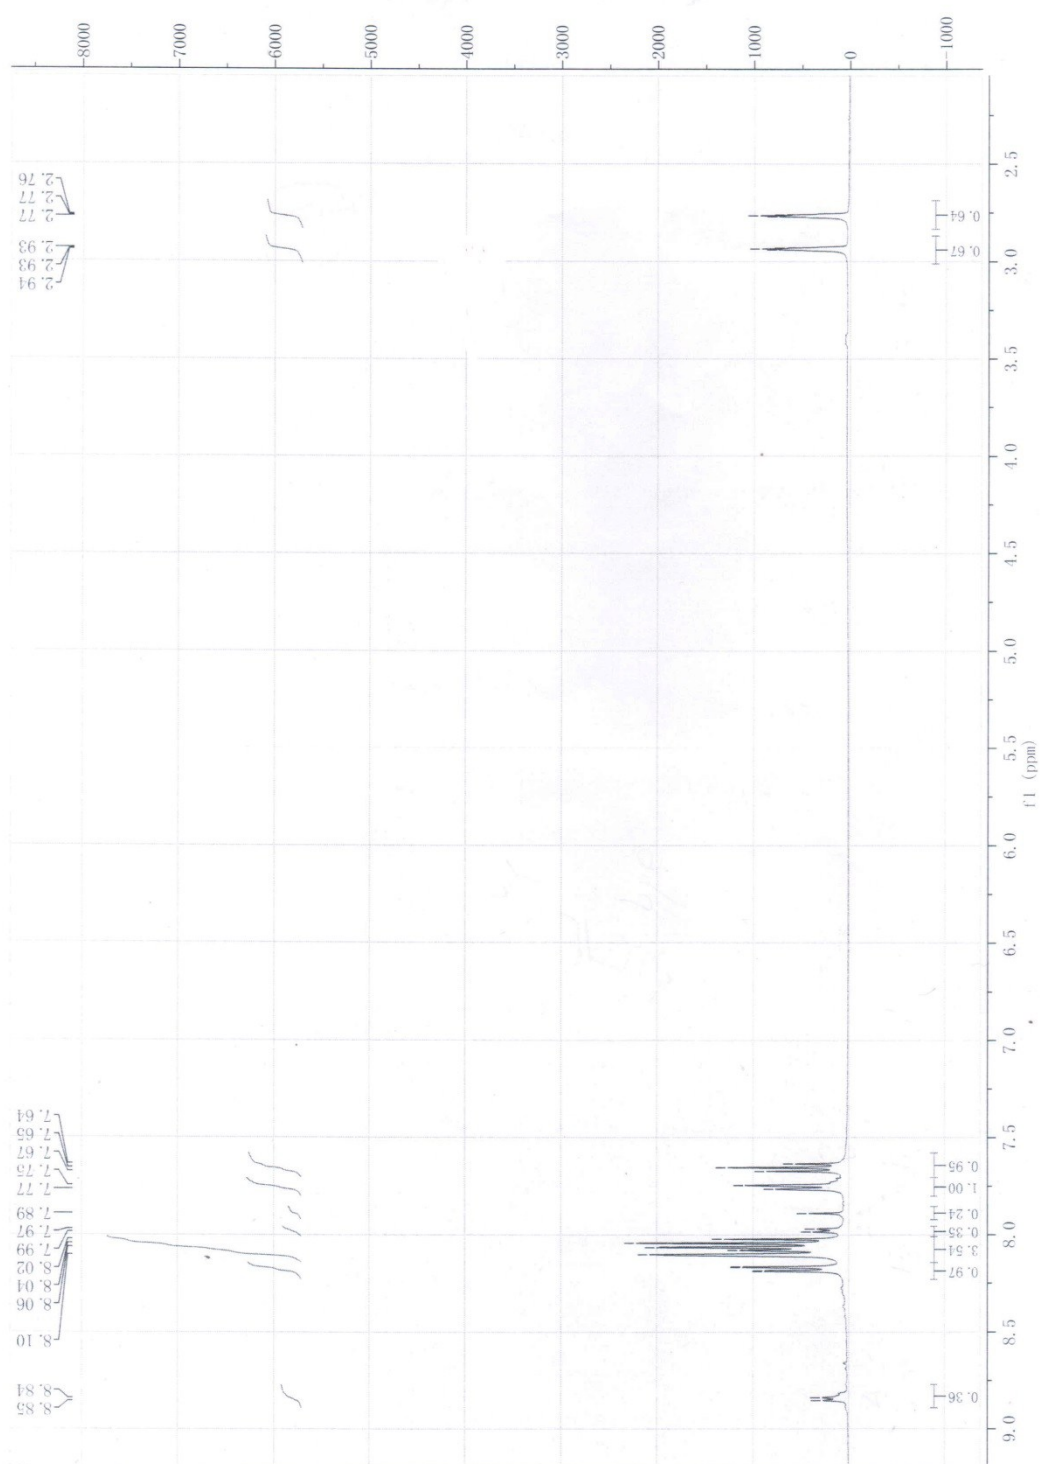

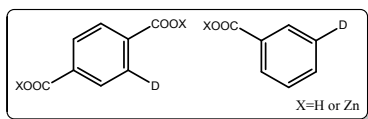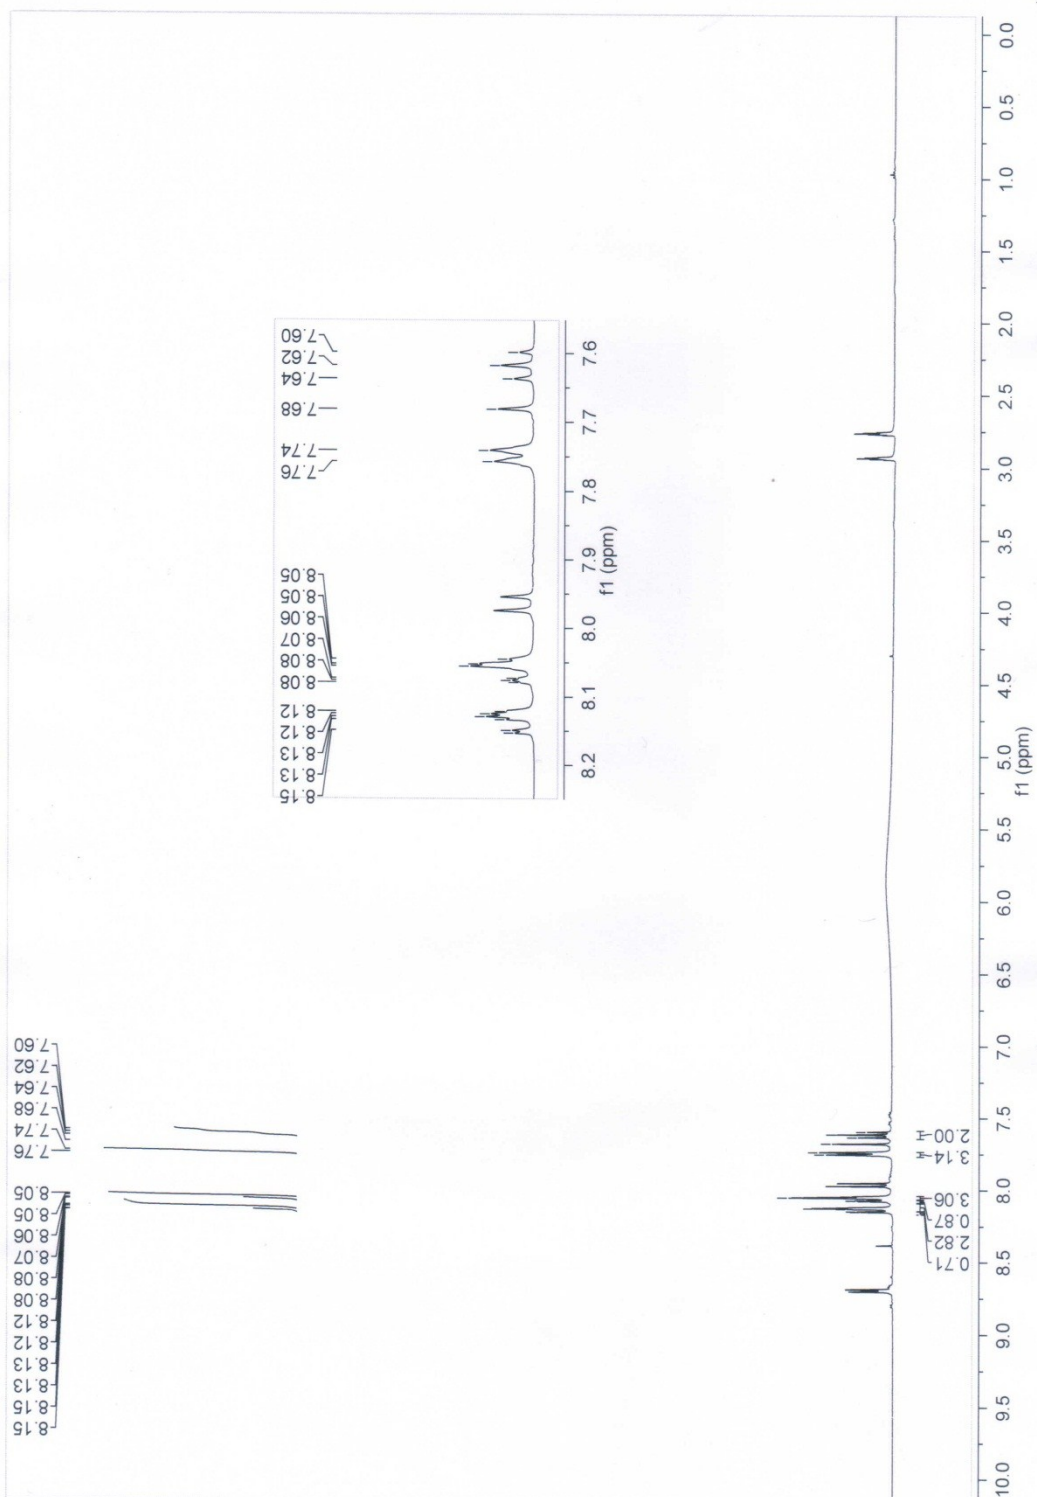

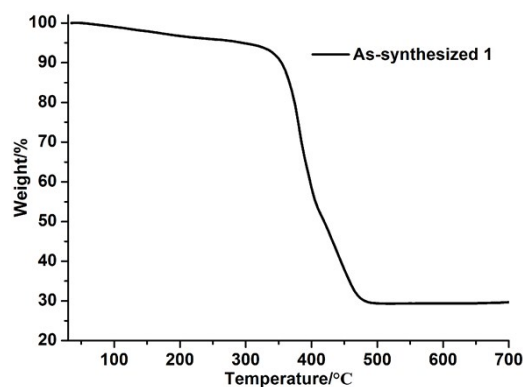

(a)

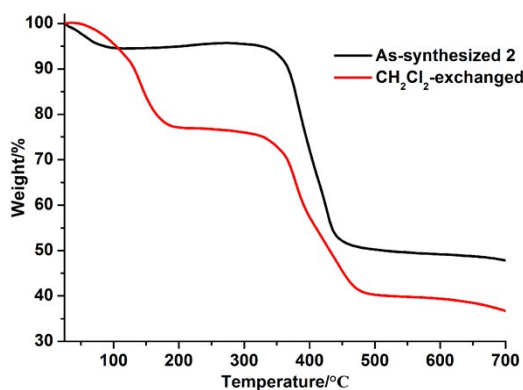

(b)

**Figure S4.** TGA plots for the as-synthesized **1**, **2** and the  $\text{CH}_2\text{Cl}_2$ -exchanged sample. For **1**, a total weight loss of 3.4% at 32–210 °C, corresponding to the loss of 1  $\text{H}_2\text{O}$  guest molecules per formula unit (calc. 3.3%). Then, the structure without the solvent molecules is maintained until 340 °C. For **2**, a total weight loss of 22.8 % at 25–200 °C, corresponding to the loss of 1DMF and 1  $\text{H}_2\text{O}$  guest molecules per formula unit (calc. 22.1%). Then, the desolvated framework is stable until 350 °C. For the  $\text{CH}_2\text{Cl}_2$ -changed sample  $[\text{Zn}(\text{bdc})(\text{bpe})_{0.5}] \cdot \text{H}_2\text{O}$ , the initial weight loss of 5.2% from 25–90 °C should be attributed to the  $\text{H}_2\text{O}$  guest molecules per formula unit (calc. 5.6%), then followed by a plateau of stability from 90 to 350 °C.

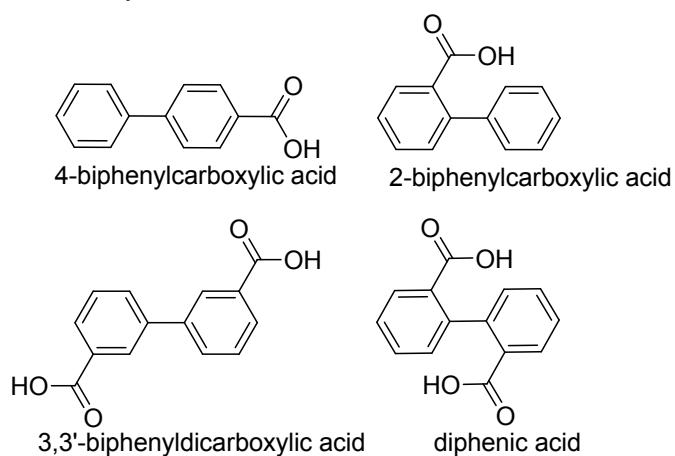

**Scheme S1** The other biphenylcarboxylic acids were used in the reaction.

**Table S5.** Crystal data and structure refinements for **1** and **2**

| Complex No.                                                                                               | <b>1</b>                                                         | <b>2</b>                                          |
|-----------------------------------------------------------------------------------------------------------|------------------------------------------------------------------|---------------------------------------------------|
| Empirical formula                                                                                         | C <sub>27</sub> H <sub>20</sub> N <sub>2</sub> O <sub>7</sub> Zn | C <sub>14</sub> H <sub>9</sub> NO <sub>4</sub> Zn |
| Formula mass                                                                                              | 549.84                                                           | 320.61                                            |
| Temperature [K]                                                                                           | 296(2)                                                           | 296(2)                                            |
| Crystal system                                                                                            | Orthohombic                                                      | Tetragonal                                        |
| Space group                                                                                               | <i>P</i> 2 <sub>1</sub> 2 <sub>1</sub> 2                         | <i>P</i> <sub>4</sub> / <i>mmm</i>                |
| <i>a</i> [Å]                                                                                              | 15.7341(18)                                                      | 10.8088(15)                                       |
| <i>b</i> [Å]                                                                                              | 19.190(2)                                                        | 10.8088(15)                                       |
| <i>c</i> [Å]                                                                                              | 8.3925(10)                                                       | 16.283(5)                                         |
| $\alpha$ [deg]                                                                                            | 90.00                                                            | 90.00                                             |
| $\beta$ [deg]                                                                                             | 90.00                                                            | 90.00                                             |
| $\gamma$ [deg]                                                                                            | 90.00                                                            | 90.00                                             |
| <i>V</i> [Å <sup>3</sup> ]                                                                                | 2534.0(5)                                                        | 1902.3(7)                                         |
| <i>Z</i>                                                                                                  | 4                                                                | 2                                                 |
| <i>D</i> <sub>calcd.</sub> [g·cm <sup>-3</sup> ]                                                          | 1.436                                                            | 0.560                                             |
| $\mu$ [mm <sup>-1</sup> ]                                                                                 | 1.018                                                            | 0.649                                             |
| GOF on F <sup>2</sup>                                                                                     | 1.079                                                            | 1.145                                             |
| reflns collected/ unique                                                                                  | 12774/4502                                                       | 10471/1203                                        |
| <i>R</i> <sub>int</sub>                                                                                   | 0.0668                                                           | 0.0841                                            |
| <i>R</i> <sub>1</sub> <sup><i>a</i></sup> , <i>wR</i> <sub>2</sub> <sup><i>b</i></sup> [I>2 $\sigma$ (I)] | 0.0702, 0.1932                                                   | 0.0863, 0.2481                                    |
| <i>R</i> <sub>1</sub> , <i>wR</i> <sub>2</sub> (all data)                                                 | 0.1014, 0.2214                                                   | 0.0968, 0.2583                                    |

$$^a R_1 = \Sigma ||F_o| - |F_c|) / \Sigma |F_o|; ^b wR_2 = [\Sigma w(F_o^2 - F_c^2)^2 / \Sigma w(F_o^2)^2]^{1/2}$$
